# Supplementary material for: Porous films by the self-assembly of inorganic rod-b-coil block copolymers: mechanistic insights into the vesicle-to-pore morphological evolution
Source: Royal Society of Chemistry journal article supplement (doi:10.1039/c5sm02861b), 2016-01-01
Supplement: c5sm02861b1.pdf [file c5sm02861b1.pdf]

**Supporting Information for**

**Porous films by the self-assembly of inorganic rod-coil block copolymers. Mechanistic insights into the vesicle-to-pore morphological evolution.**

Silvia Suárez-Suárez, Gabino A. Carriedo, and Alejandro Presa Soto\*

*†Facultad de Química. Departamento de Química Orgánica e Inorgánica. IUQOEM. Universidad de Oviedo. Julián Clavería s/n, 33006, Oviedo (Spain)*

*\*presaalejandro@uniovi.es*

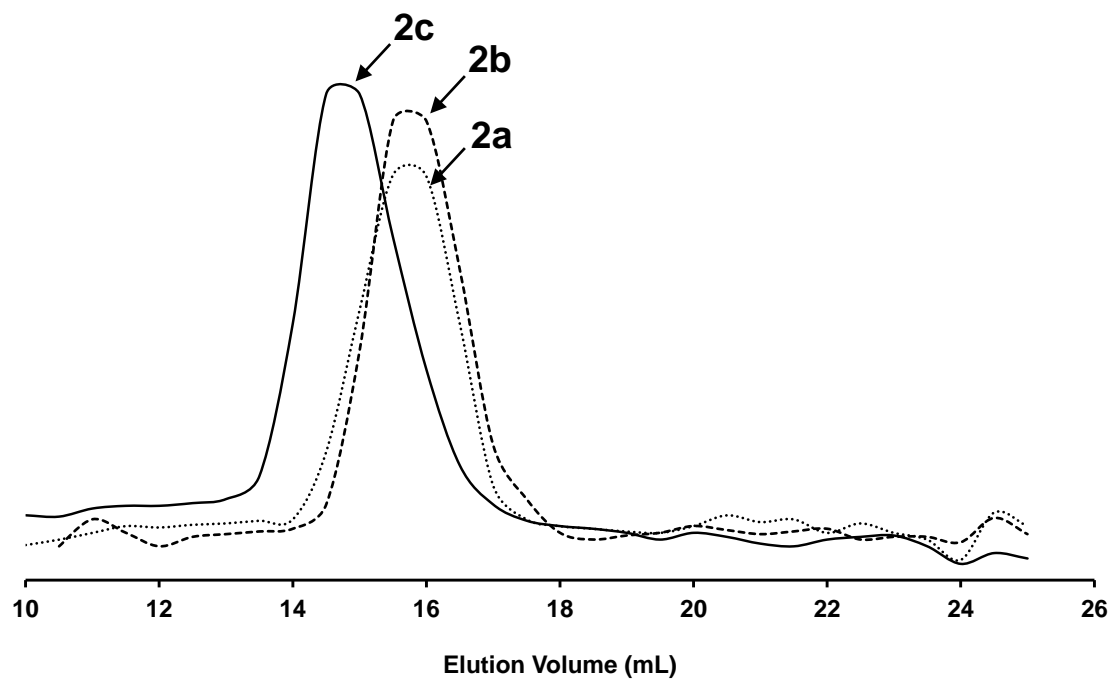

**Figure S1.** GPC traces of block copolymers **2a-c** using THF having tetra-*n*-butylammonium bromide (0.1 % w/w) as eluent.

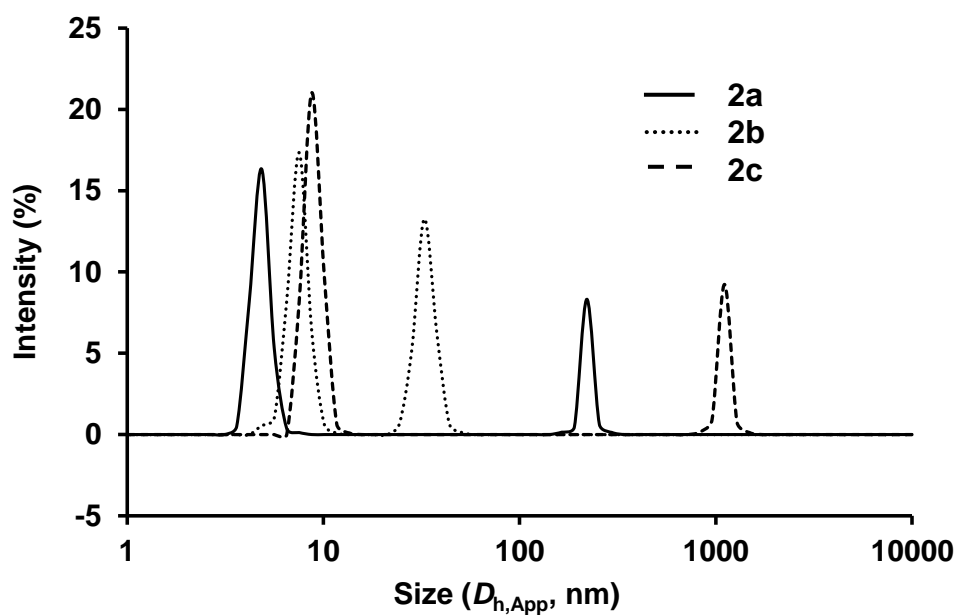

**Figure S2.** Dynamic light scattering traces of THF solutions (5 mg / mL) of BCPs **2a-c**.

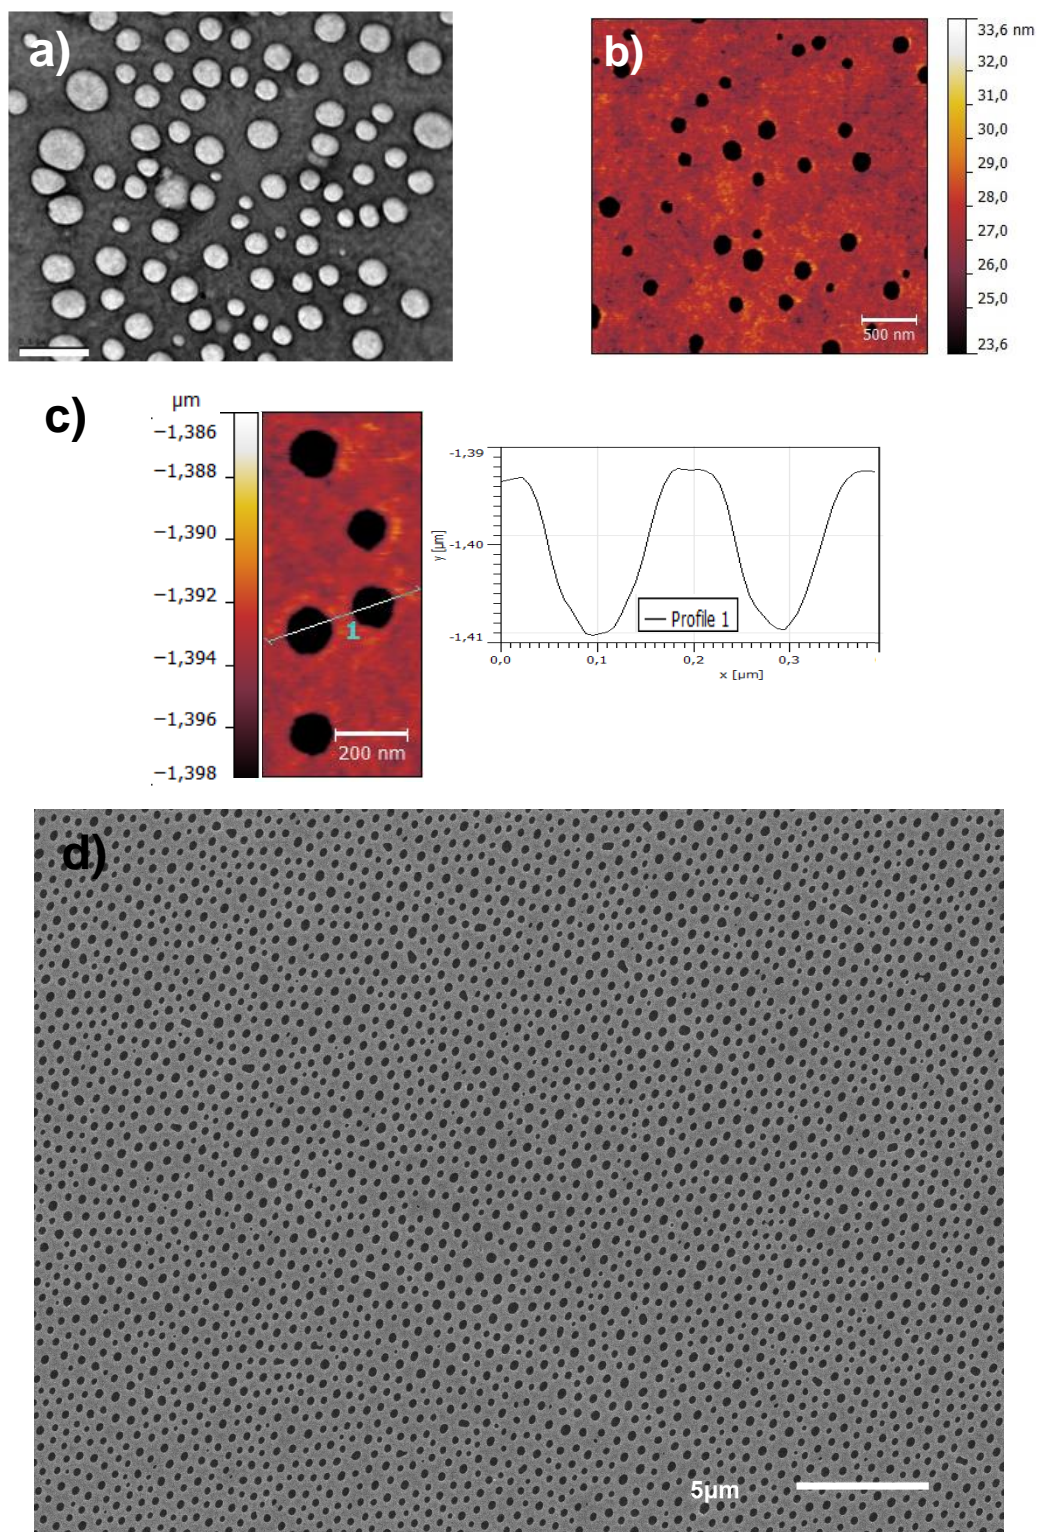

**Figure S3.** Porous films of BCP 2a: a) Bright-field TEM image (inset scale bar corresponds to 500 nm). b) AFM height image. c) AFM height image (inset scale bar corresponds to 200 nm) and cross-sectional height profiles across two pores. (d) SEM image (inset scale bar corresponds to 5000 nm).

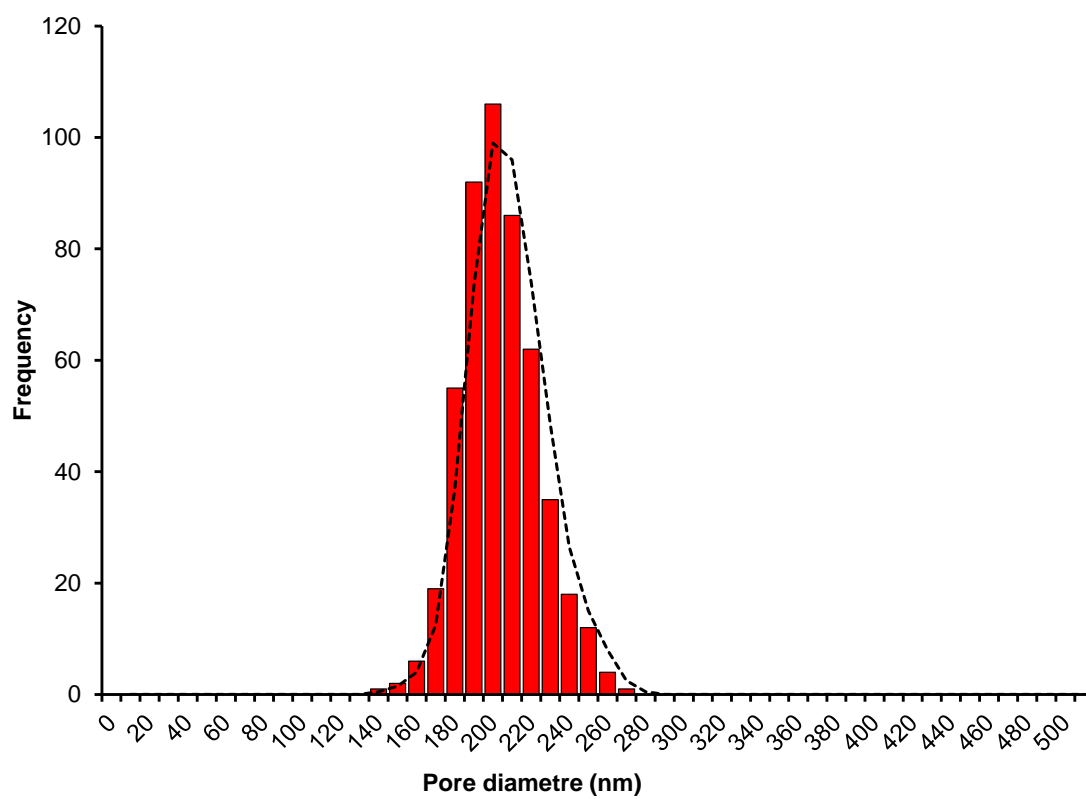

**Figure S4.** Histogram of the size (diameter) distribution of pores of BCP **2a** (number of objects,  $N = 500$ ).

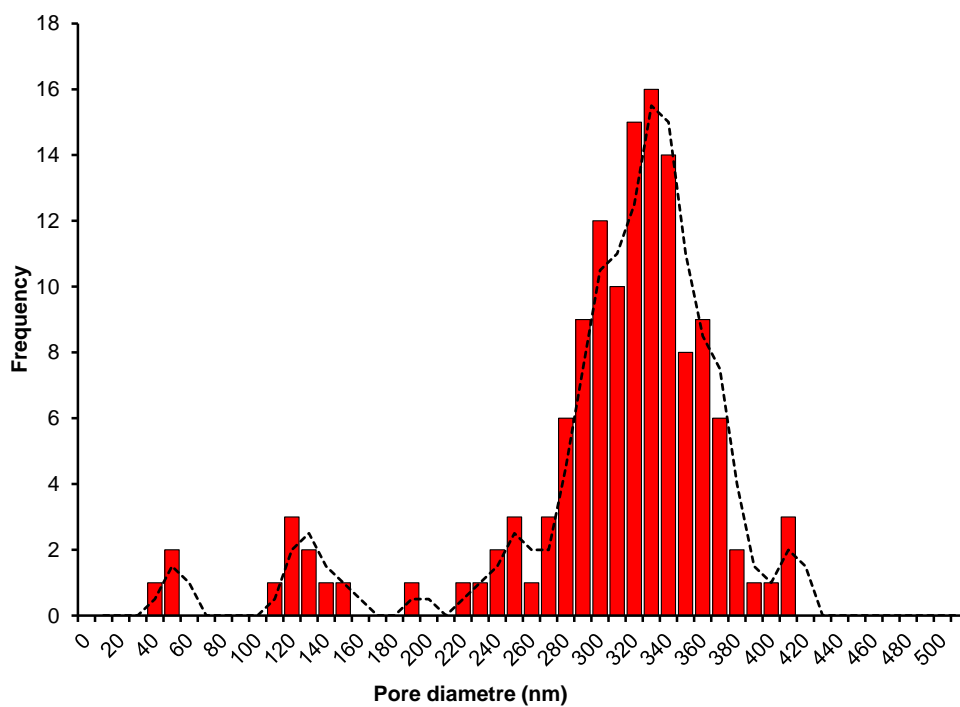

**Figure S5.** Histogram of the size (diameter) distribution of vesicles of BCP **2a** (number of objects,  $N = 135$ ).

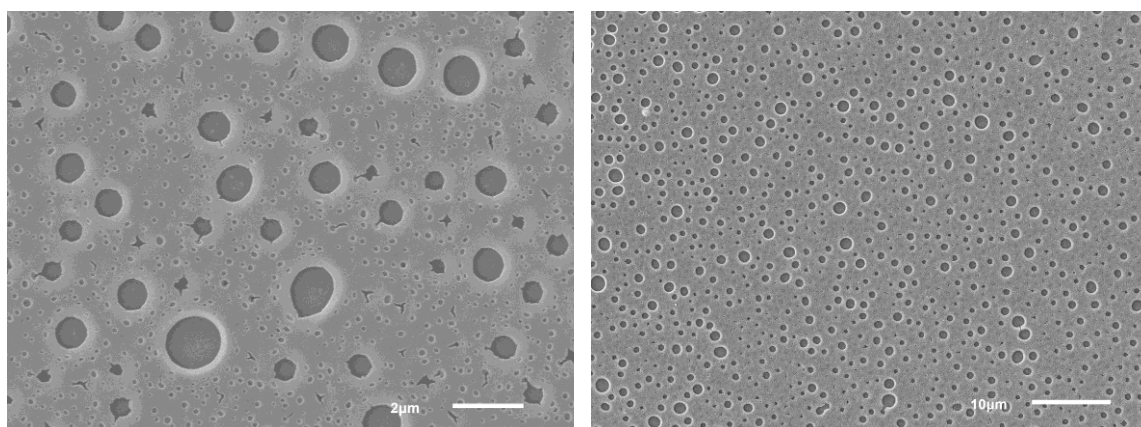

**Figure S6.** SEM images of porous films prepared by drop-casting of a 5 mg / mL solution of BCP **2a** in THF.

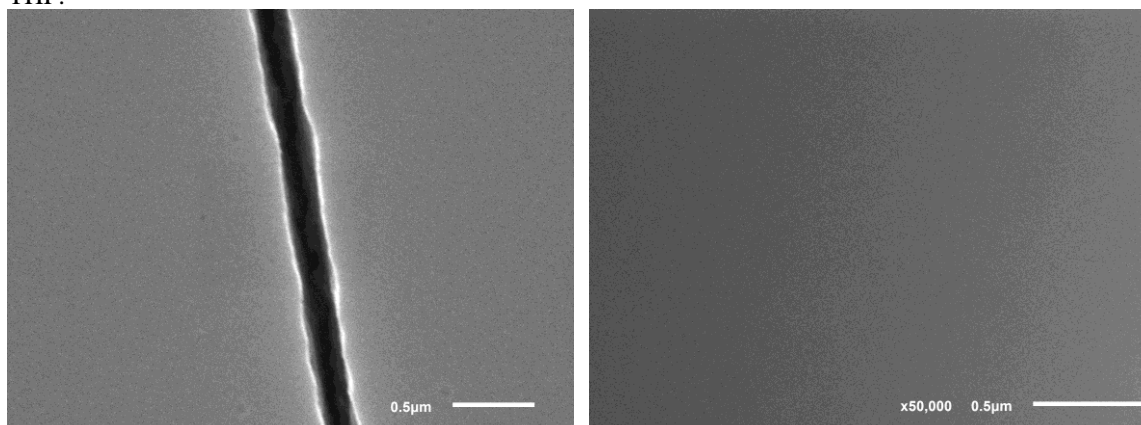

**Figure S7.** SEM images of porous films prepared by drop-casting of a 20 mg / mL solution of BCP **2a** in THF.

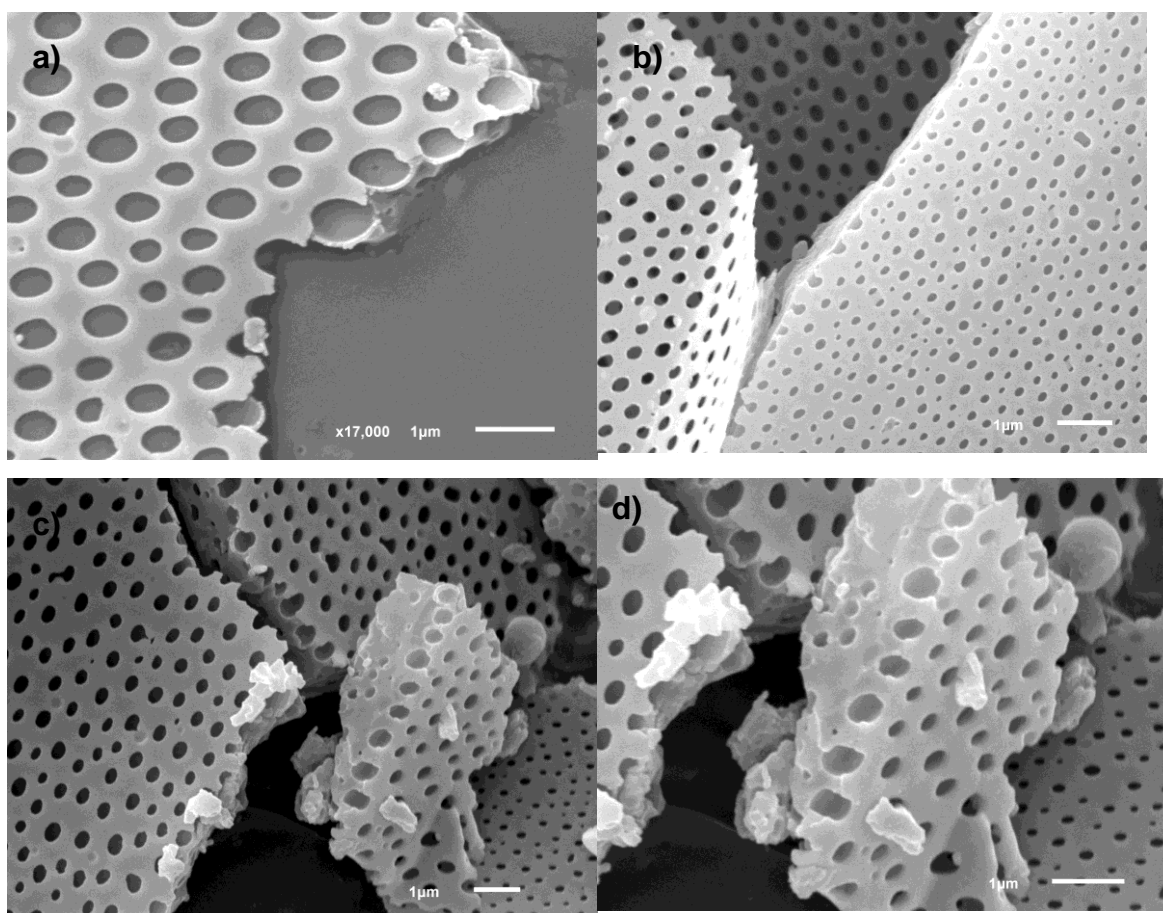

**Figure S8.** SEM pictures showing the structure of the pores located underneath the top-surface layer of the film of **2a**. In picture b) a flexible porous sheet can be observed at the left part of the SEM image.

at 1000 rpm

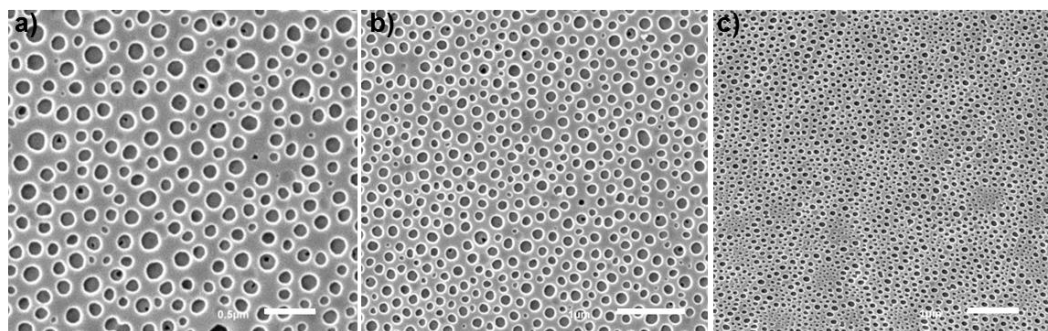

at 3000 rpm

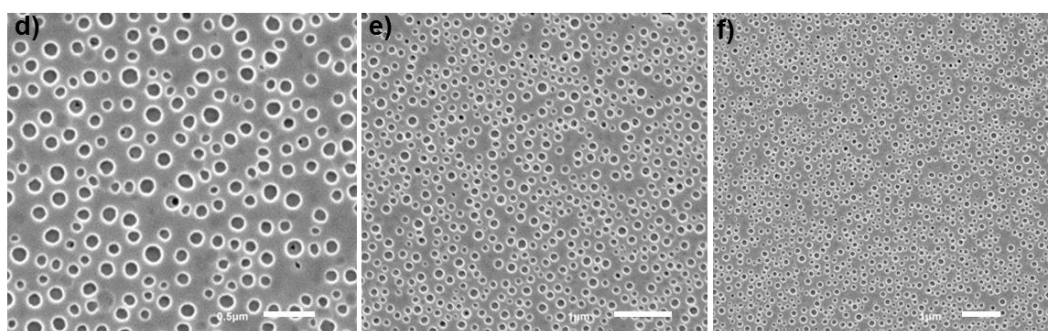

at 5000 rpm

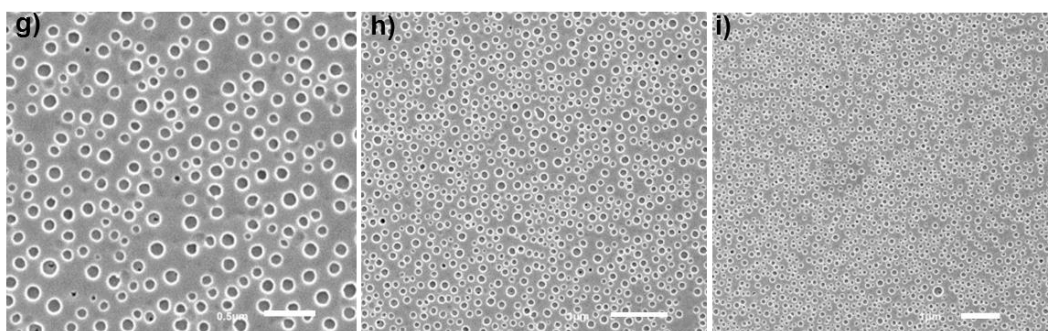

**Figure S9.** SEM images of porous films formed by spin-coating of a BCP **2a** solution ( $10 \text{ mg mL}^{-1}$  in THF) at different rotational speeds: (a, b, c) at 1000 rpm (inset scale bars correspond to 0.5, 1 and 1  $\mu\text{m}$  respectively); (d, e, f) at 3000 rpm (inset scale bars represent 0.5, 1 and 1  $\mu\text{m}$  respectively); (g, h, i) at 5000 rpm (inset scale bars correspond to 0.5, 1 and 1  $\mu\text{m}$  respectively).

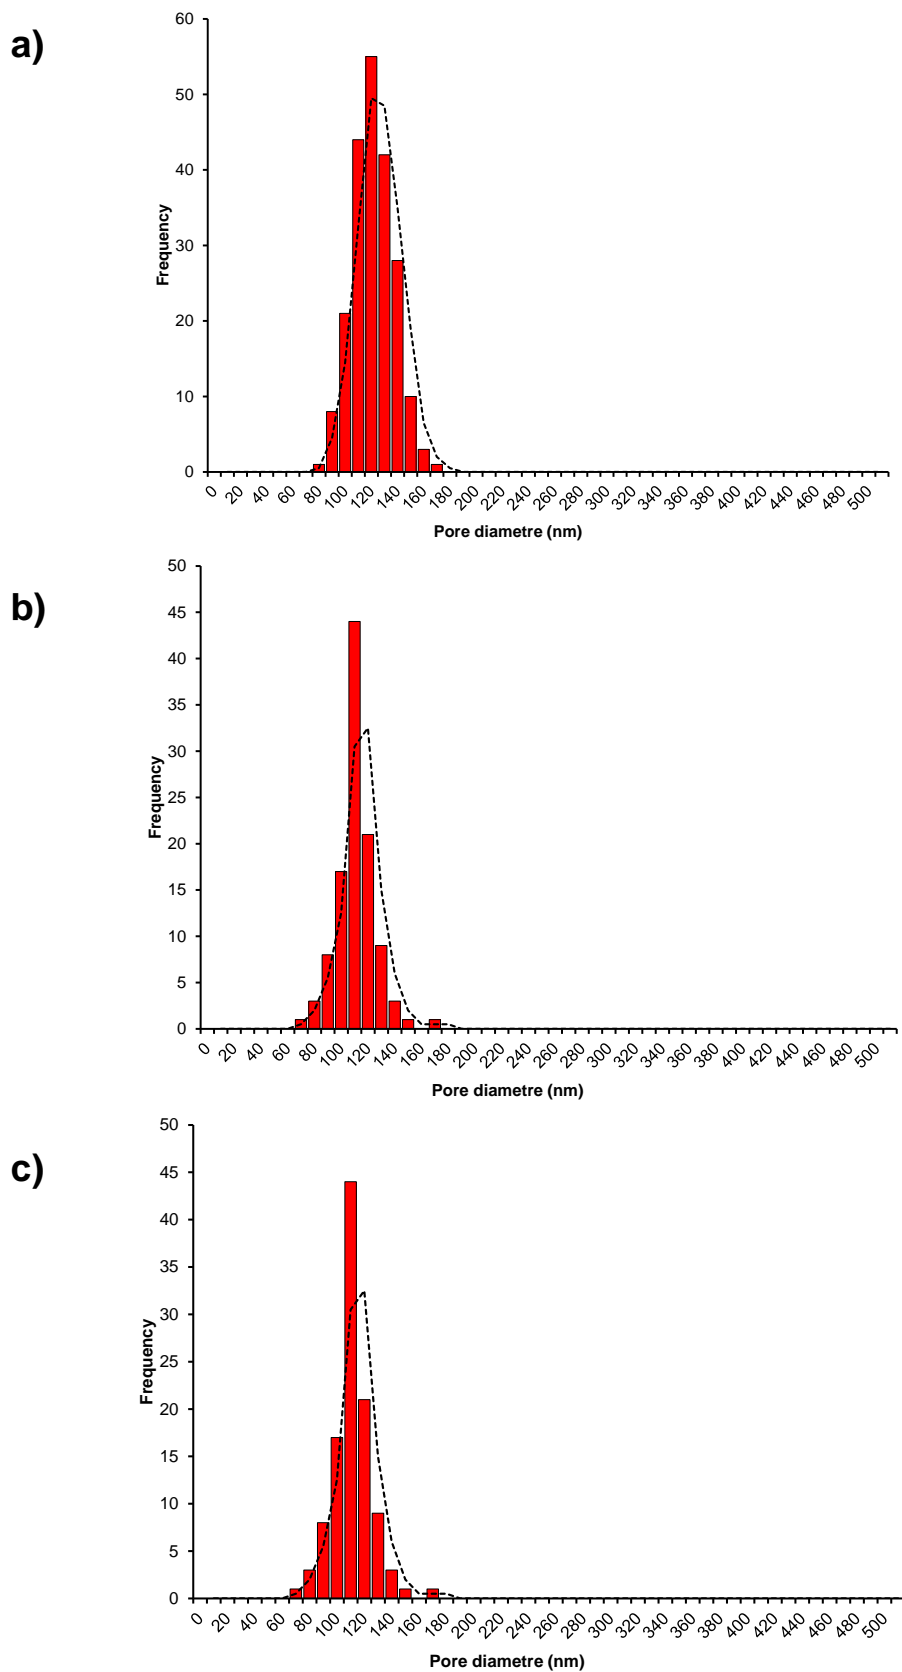

**Figure S10.** Histogram of the size (diameter) distribution of pores prepared by spin-coating of a 10 mg / mL solution of BCP **2a** in THF at: (a) 1000 rpm (number of objects,  $N = 213$ ). (b) 3000 rpm (number of objects,  $N = 108$ ). (c) 5000 rpm (number of objects,  $N = 156$ )



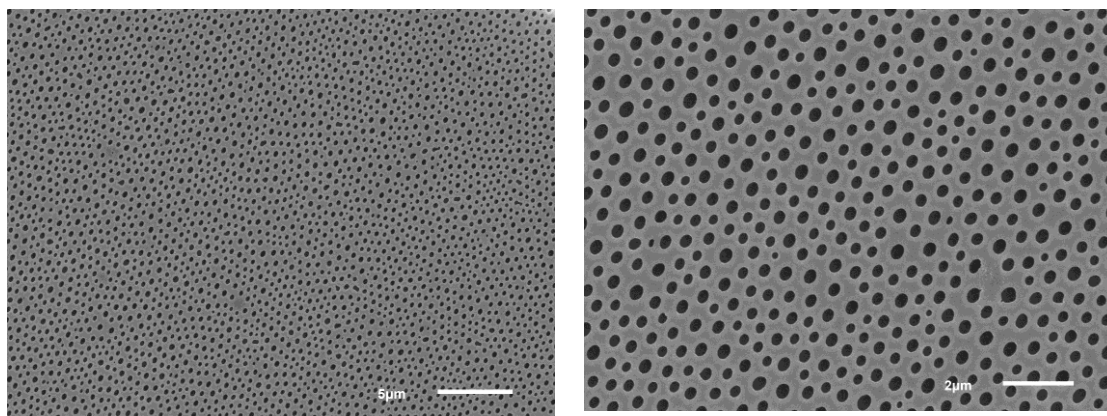

**Figure S11.** SEM images of the porous films of BCP **2a** after heating at 100° C during 8 hours under vacuum.

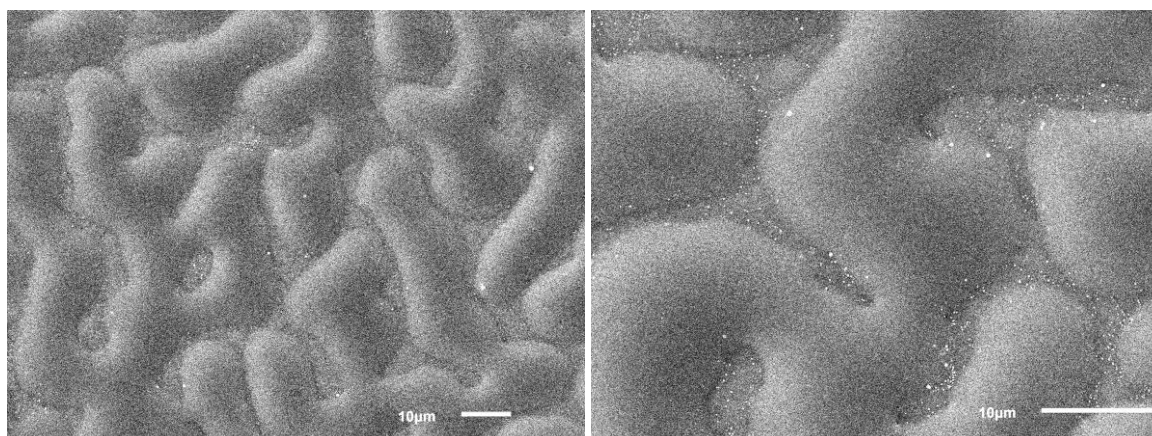

**Figure S12.** SEM images of the porous films of BCP **2a** after heating at 190° C during 8 hours under vacuum.

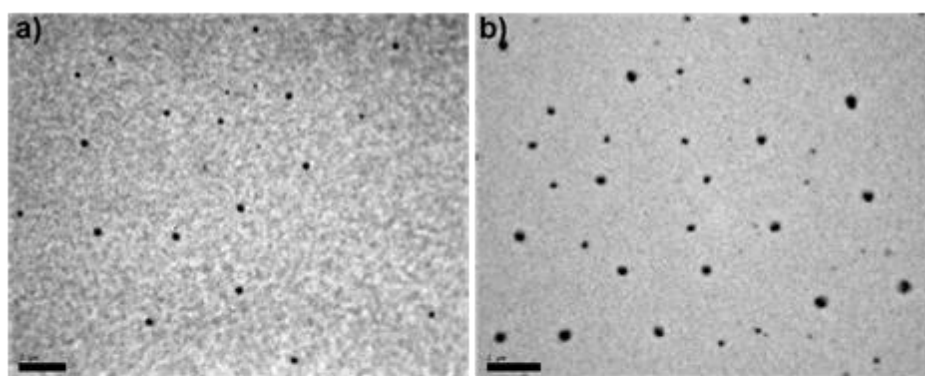

**Figure S13.** Bright field TEM micrographs of spherical micelles after the THF annealing (10 days). Inset scale bars correspond to 2 μm (a) and 1 μm (b).

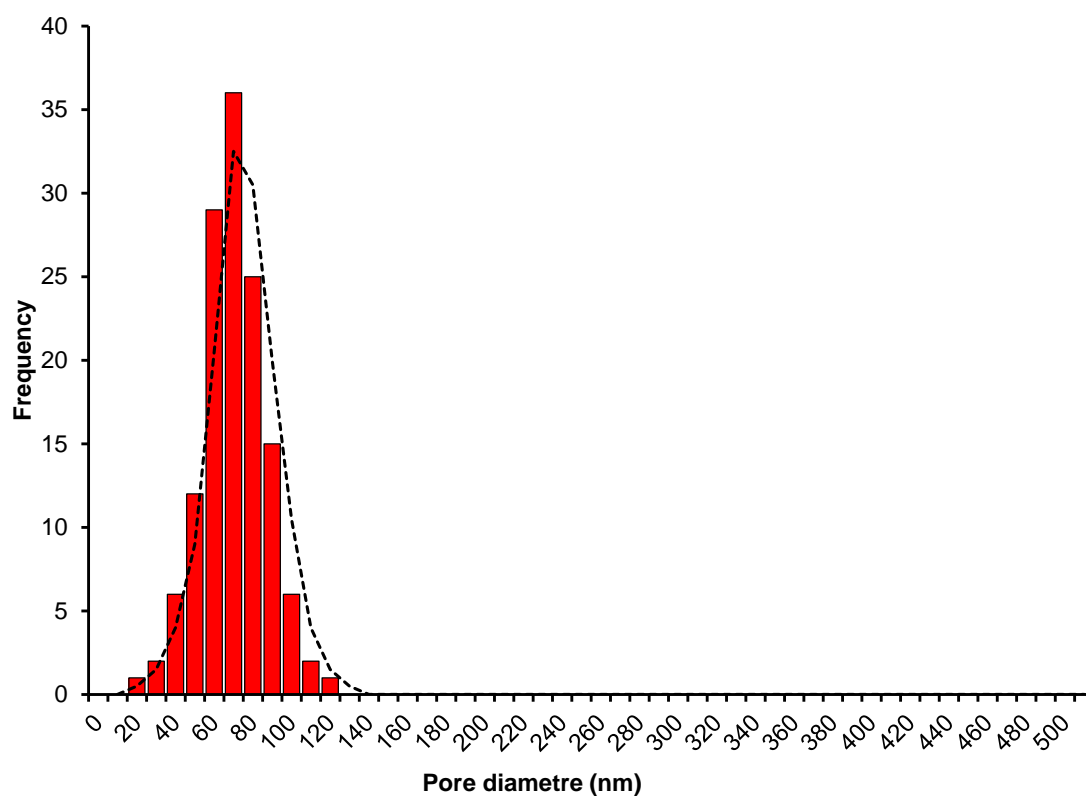

**Figure S14.** Histogram of the size (diameter) distribution of nanospheres of BCP **2a** (number of objects,  $N = 135$ ) obtained after a solvent annealing (10 days) of previously formed porous films.

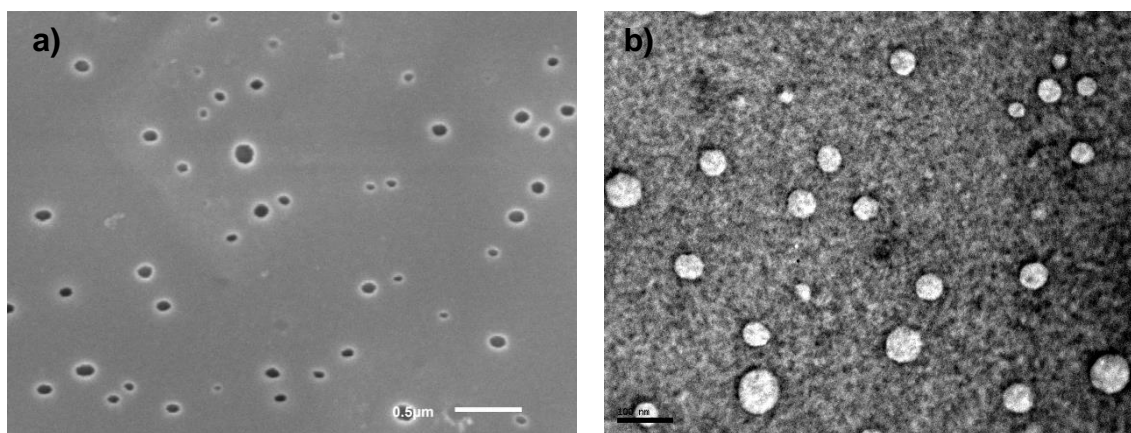

**Figure S15.** SEM (a) and bright TEM (b) pictures of porous films of BCP **2b** (THF, 10 mg /mL b. Inset scale bar corresponds to 200 nm).

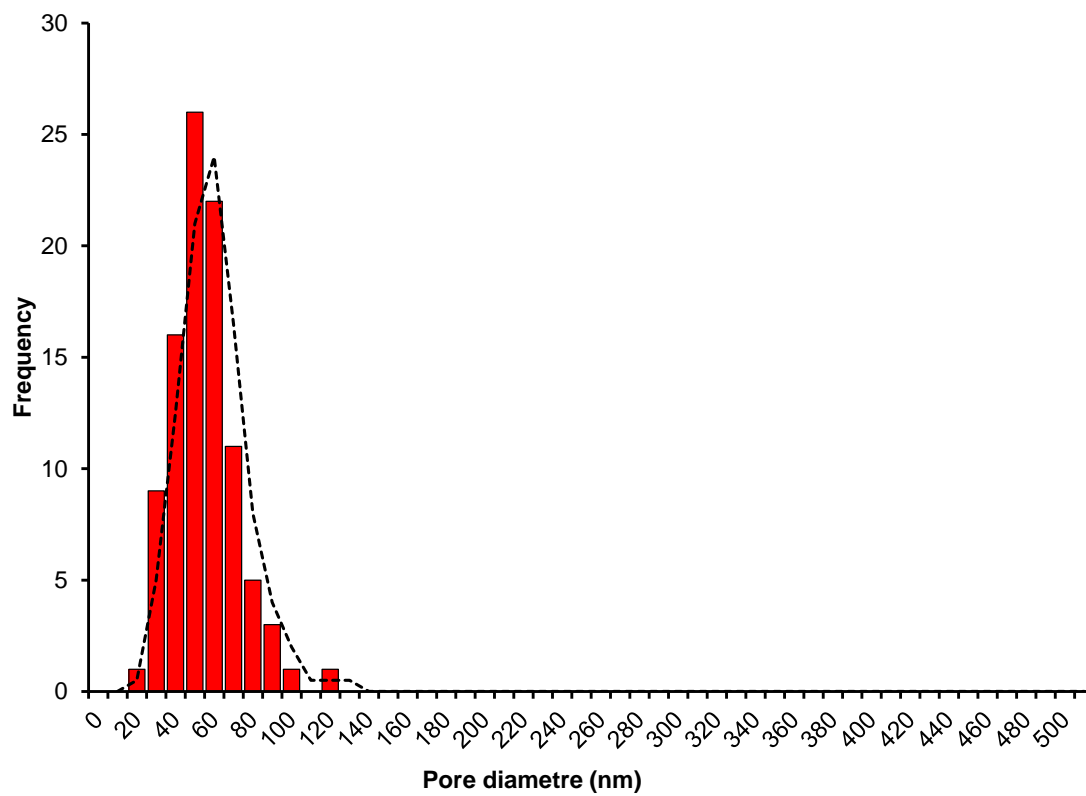

**Figure S16.** Histogram of the size (diameter) distribution of pores of BCP **2b** (number of objects,  $N = 95$ ).

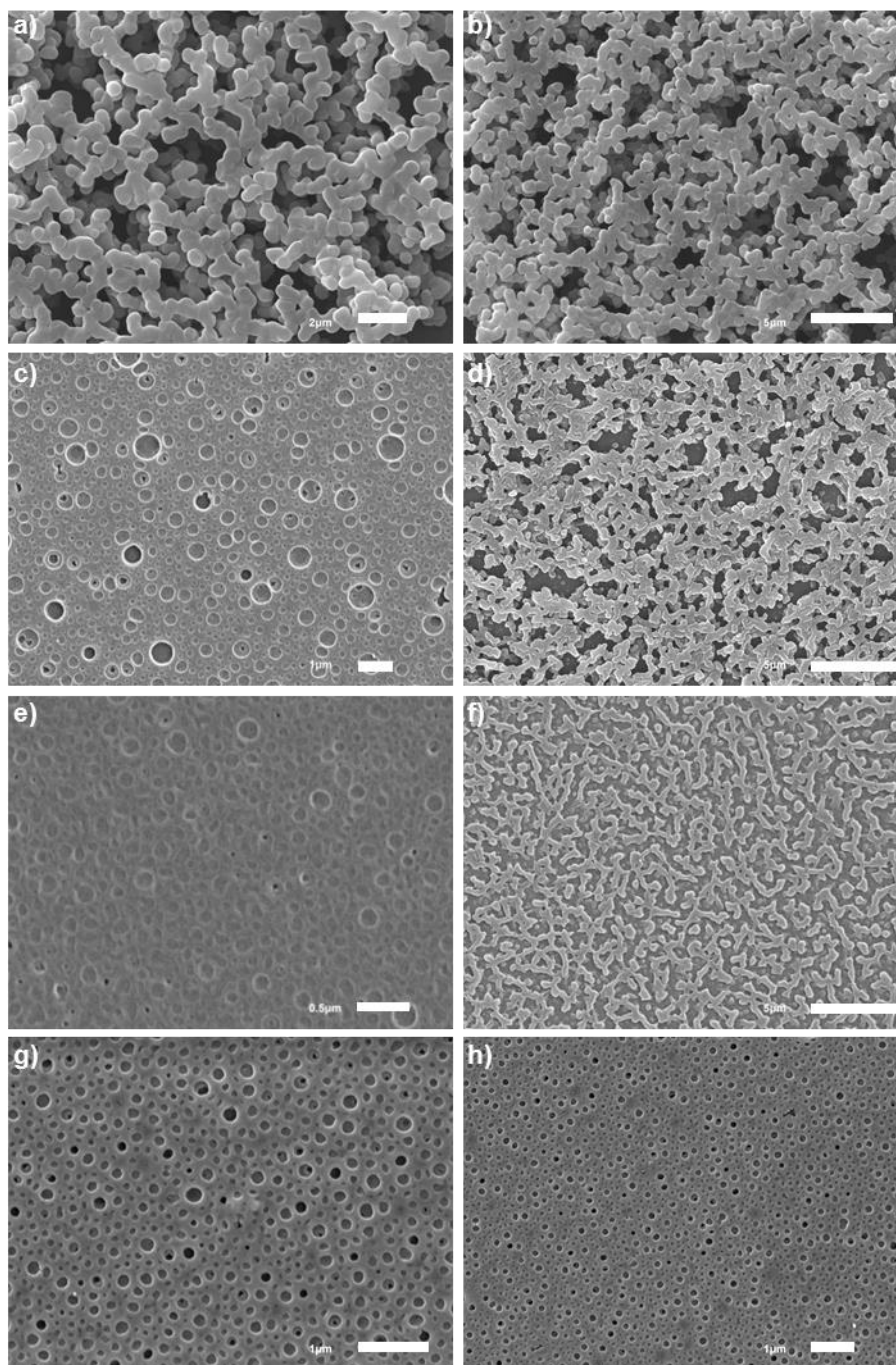

**Figure S17.** SEM images of porous films prepared by spin-coating of a BCP **2c** solution ( $10 \text{ mg mL}^{-1}$  in THF) at different rotational speeds: (a, b) at 500 rpm (inset scale bars correspond to 2 and 5  $\mu\text{m}$  respectively); (c, d) at 1000 rpm (inset scale bars represent 1 and 5  $\mu\text{m}$  respectively); (e, f) at 3000 rpm (inset scale bars correspond to 0.5 and 5  $\mu\text{m}$  respectively); at 5000 rpm (inset scale bars correspond to 1 and 5  $\mu\text{m}$  respectively).
